# Comparison of survival and clinicopathologic features in colorectal cancer among African American, Caucasian, and Chinese patients treated in the United States: Results from the surveillance epidemiology and end results (SEER) database

Junzhong Lin<sup>1,\*</sup>, Miaozen Qiu<sup>2,3,\*</sup>, Ruihua Xu<sup>2,\*</sup> and Adrian Sandra Dobs<sup>4</sup>

<sup>1</sup> Department of Colorectal Surgery, Sun Yat-Sen University Cancer Center, State Key Laboratory of Oncology in South China, Collaborative Innovation Center for Cancer Medicine, Guangzhou, China

<sup>2</sup> Department of Medical Oncology, Sun Yat-Sen University Cancer Center, State Key Laboratory of Oncology in South China, Collaborative Innovation Center for Cancer Medicine, Guangzhou, China

<sup>3</sup> Department of Oncology, The Sidney Kimmel Comprehensive Cancer Center, The Johns Hopkins University School of Medicine, Baltimore, MD, USA

<sup>4</sup> Division of Endocrinology, Diabetes and Metabolism, The Johns Hopkins Center to Reduce Cancer Disparities, The Johns Hopkins University School of Medicine, Baltimore, MD, USA

\* These authors have contributed equally to this work

**Correspondence to:** Adrian Sandra Dobs, **email:** adobs@jhu.edu

**Keywords:** colorectal cancer, race/ethnicity, SEER, survival analysis

**Received:** July 11, 2015

**Accepted:** August 07, 2015

**Published:** August 24, 2015

This is an open-access article distributed under the terms of the Creative Commons Attribution License, which permits unrestricted use, distribution, and reproduction in any medium, provided the original author and source are credited.

## ABSTRACT

**African American patients of colorectal cancer (CRC) were found to have a worse prognosis than Caucasians, but it has not been fully understood about the survival difference among Chinese and these two races above. In this study, we used the Surveillance, Epidemiology and End Results database to analyze the survival difference among these three race/ethnicities in the United States. Adenocarcinoma patients of colorectal cancer with a race/ethnicity of Caucasian, Chinese and African American were enrolled for study. Patients were excluded if they had more than one primary cancer but the CRC was not the first one, had unknown cause of death or unknown survival months. The 5-year cause specific survival (CSS) was our primary endpoint. Totally, there were 585,670 eligible patients for analysis. Chinese patients had the best and African American patients had the worst 5-year CSS (66.7% vs 55.9%),  $P < 0.001$ . The 5-year CSS for Caucasian patients was 62.9%. Race/ethnicity was an independent prognostic factor in the multivariate analysis,  $P < 0.001$ . The comparison of clinicopathologic factors among these three race/ethnicities showed that the insurance coverage rate, income, percentage that completing high school and percentage of urban residence was lowest in the African American patients. Chinese patients had the highest percentage of married, while African American patients ranked lowest. More African American patients were diagnosed as stage IV and had high percentage of signet ring cell and mucinous adenocarcinoma. It is likely that biological differences as well as socioeconomic status both contribute to the survival disparity among the different race/ethnicities.**

## INTRODUCTION

Colorectal cancer (CRC) is among the leading causes of cancer related deaths all over the world [1]. The survival of CRC patients differs according to race in the

United States. Several studies have shown elevated CRC mortality rate and shorter survival for African Americans compared with Caucasians patients [2, 3]. CRC was also one of the most common cancers in Chinese population. It was reported to have 310,244 newly diagnosed CRC

patients in China in 2011 [4]. There were few reports about the survival differences among African American, Caucasian and Chinese CRC patients. In 2012, Hashiguchi Y et al. reported the impact of race/ ethnicity on prognosis of colon cancer patients [5]. They showed that East Asian American patients (including Chinese patients) had significantly better prognosis, and African American patients had worse prognosis than non-Hispanic white patients [5]. However, they only analyzed colon cancer patients who had underwent surgery. We are not aware of any other reports comparing African American, Caucasian, and Chinese CRC Patients.

It is hard to get a convincing conclusion if we compare these three groups of patients using different databases. The Surveillance Epidemiology and End Results (SEER) Database (<http://seer.cancer.gov/data/citation.html>), a report on the most recent cancer incidence, mortality, survival, prevalence, and lifetime risk statistics, is published annually by the Data Analysis and Interpretation Branch of the National Cancer Institute, USA. It provides various race/ethnicities (including white, black and Chinese) with a large sample size in the United States, moreover it contains no identifiers and is therefore a good database for our study.

In this study, we used data from the SEER cancer-registry program of individuals diagnosed with CRC from 1973 to 2012 to compare the survival and clinicopathologic features among African American, Caucasian, and Chinese Patients.

## RESULTS

### Patient baseline characteristics

The study identified 585,670 adenocarcinoma patients of the colorectal cancer. Of these patients, 514,497 (87.8 %) were Caucasian, 61062 (10.4%) were African American and 10111(1.8%) were Chinese. Table 1 showed the basic features among these three groups of patients.

Overall there was 238,491 (40.7%) left colon cancer patients, 231,143 (39.5%) right colon cancer patients and 116,036 (19.8%) rectum cancer patients. Chinese patients had the highest percentage of left colon cancer, African American had more right colon cancer, while Caucasian had the highest percentage of rectum cancer.

African American patients tended to be younger than both Caucasian and Chinese patients (mean age: 64.3 vs 68.5 vs 67.6, respectively,  $P < 0.001$ ). African American patients showed a higher ratio of female patients (52.3%) while male patients were more common in both Caucasian and Chinese patients (51.4% and 53.2%),  $P < 0.001$ .

The Tumor-Node-Metastasis (TNM) stage had no significant difference between Caucasian and African American patients, while Chinese patients had

a significant lower percentage of stage IV diseases than both Caucasian and African American patients (18.0% vs 18.8% vs 24.7%,  $P < 0.001$ ). Furthermore, we found that Chinese patients had the lower percentage of signet ring cell and mucinous adenocarcinoma than both Caucasian and African American patients (8.1% vs 10.1% vs 10.2%,  $P < 0.001$ ).

About 97% of Caucasian and Chinese patients were covered by the insurance, significantly higher than black patients, 93%,  $P < 0.001$ . Almost 70% of Chinese patients were married, significantly higher than Caucasian or African American patients (59.3% and 43.0%),  $P < 0.001$ . African American patients had lower income and higher rural residence than both Caucasian and Chinese patients. As for the education level, Caucasian patients had higher percentage of completing high school.

### Survival

In this study, 188,682 deaths (36.7 %) were observed among the Caucasian patients ( $N = 514,497$ ), 3305 deaths (32.7 %) among Chinese patients ( $N = 10,111$ ) and 25,214 deaths (41.3%) among the African American patients ( $N = 61,062$ ). The Chinese patients had significantly longer 5-year cause specific survival (CSS) (66.7%) than the Caucasians and African Americans (62.9% and 55.9%),  $P < 0.001$  (Figure 1).

The median age of the whole population was 69 years old. We divided the patients into two groups according to the age:  $< 70$  years old (younger patients) and  $> 69$  years old (older patients). The younger patients had a significantly better 5-year CSS than the older patients (65.6% vs 58.7%,  $P < 0.001$ ). Female patients had a slightly better 5-year CSS than male (62.5% vs 62.1%,  $P = 0.0024$ ). The site of tumor also had an effect on the survival, left colon had better 5-year CSS than right colon and rectum cancer patients, 64.0% vs 61.6% vs 60.3%, respectively,  $P < 0.001$  (Table 2).

No doubt, the TNM stage was significantly correlated with survival. It was 90.9%, 81.3%, 66.8% and 12.2% for patients from stage I to stage IV respectively,  $P < 0.001$ . As for the histology subtype, signet ring cells had the worst 5-year CSS than the mucinous adenocarcinoma or other adenocarcinoma, 30.4% vs 57.1% vs 63.1%,  $P < 0.001$ . More in detail, when we compared the 5-year CSS in patients with different grades, we found that the survival became poorer as the tumor grade progressed from well to undifferentiated, 73.9% for well differentiated, 65.8% for moderately differentiated, 48.1% for poorly differentiated and 45.9% for undifferentiated tumors,  $P < 0.001$ .

We also analyzed the influence of insurance on the survival and found that there was 10% higher 5-year CSS in the insured group than uninsured group, 67.2% vs 57.8%,  $P < 0.001$ .

With the change in secular time, we found that the survival of CRC patients became better and better. In

**Table 1: Basic characteristics among the three race/ethnicities**

|                                               | Caucasian N = 514,497 (%) | Chinese N = 10,111 (%) | African American N = 61,062 (%) | P <sup>1</sup> value | P <sup>2</sup> value | P <sup>3</sup> value |
|-----------------------------------------------|---------------------------|------------------------|---------------------------------|----------------------|----------------------|----------------------|
| Sex<br>N = 585,670                            |                           |                        |                                 |                      |                      |                      |
| Male                                          | 264,671 (51.4)            | 5,379 (53.2)           | 29,131 (47.7)                   | <0.001               | <0.001               | <0.001               |
| Female                                        | 249,826 (48.6)            | 4,732 (46.8)           | 31,931 (52.3)                   |                      |                      |                      |
| Age (Mean±SD)                                 | 68.5±13.1                 | 67.7±13.5              | 64.6±13.3                       | <0.001               | <0.001               | <0.001               |
| Family income*, (Mean±SD)                     | 72,694±17,302             | 82,104±14,833          | 65,691±16,293                   | <0.001               | <0.001               | <0.001               |
| Education (%)# (Mean±SD)                      | 86.2±5.8                  | 84.8±5.2               | 84.3±5.2                        | <0.001               | <0.001               | <0.001               |
| Married status<br>N = 563,047                 |                           |                        |                                 |                      |                      |                      |
| Single or unmarried                           | 50,681 (10.2)             | 855 (8.7)              | 12,995 (22.4)                   | <0.001               | <0.001               | <0.001               |
| Married                                       | 293,840 (59.3)            | 6,845 (69.9)           | 24,950 (43.0)                   |                      |                      |                      |
| Widowed                                       | 108,270 (21.9)            | 1,695 (17.3)           | 12,043 (20.7)                   |                      |                      |                      |
| Separated or divorced                         | 42,395 (8.6)              | 404 (4.1)              | 8,074 (13.9)                    |                      |                      |                      |
| Residence<br>N = 585,670                      |                           |                        |                                 | <0.001               | <0.001               | <0.001               |
| Rural                                         | 42994 (8.4)               | 79 (0.8)               | 12944 (21.2)                    |                      |                      |                      |
| Urban                                         | 471503 (91.6)             | 10032 (99.2)           | 48118 (78.8)                    |                      |                      |                      |
| Location<br>N = 585,670                       |                           |                        |                                 |                      |                      |                      |
| Left colon                                    | 209,130 (40.6)            | 4,800 (47.4)           | 24,561 (40.2)                   | <0.001               | <0.001               | <0.001               |
| Right colon                                   | 200,982 (39.1)            | 3,202 (31.7)           | 26,959 (44.2)                   |                      |                      |                      |
| Rectum                                        | 104,385 (20.3)            | 2,109 (20.9)           | 9,542 (15.6)                    |                      |                      |                      |
| Time of diagnosis<br>N = 585,670              |                           |                        |                                 |                      |                      |                      |
| 1973-1979                                     | 48,090 (24.7)             | 455 (23.6)             | 3,222 (22.3)                    | <0.001               | <0.001               | <0.001               |
| 1980-1989                                     | 83,242 (27.3)             | 1,097 (26.6)           | 6,986 (24.3)                    |                      |                      |                      |
| 1990-1999                                     | 101,532 (28.5)            | 2,616 (31.9)           | 11,250 (27.4)                   |                      |                      |                      |
| 2000-2012                                     | 281,633 (19.5)            | 5,943 (17.9)           | 39,604 (26.0)                   |                      |                      |                      |
| AJCC 6 <sup>th</sup> TNM stage<br>N = 202,931 |                           |                        |                                 |                      |                      |                      |
| I                                             | 44,713 (25.7)             | 880 (23.8)             | 5,811 (22.9)                    | <0.001               | <0.001               | <0.001               |
| II                                            | 47,986 (27.6)             | 991 (26.8)             | 6,329 (24.9)                    |                      |                      |                      |
| III                                           | 48,404 (27.9)             | 1,153 (31.2)           | 7,000 (27.5)                    |                      |                      |                      |
| IV                                            | 32,722 (18.8)             | 667 (18.0)             | 6,275 (24.7)                    |                      |                      |                      |
| Histology subgroup<br>N = 585,670             |                           |                        |                                 |                      |                      |                      |
| Signet Ring cell                              | 4,283 (0.8)               | 66 (0.6)               | 481 (0.8)                       | <0.001               | 0.293                | <0.001               |
| Mucinous adenocarcinoma                       | 47,640 (9.3)              | 756 (7.5)              | 5,737 (9.4)                     |                      |                      |                      |
| Other adenocarcinoma                          | 462,574 (89.9)            | 9,289 (91.9)           | 54,844 (89.8)                   |                      |                      |                      |
| Grade<br>N = 500,181                          |                           |                        |                                 |                      |                      |                      |
| Well differentiated                           | 53,993 (12.3)             | 757 (8.5)              | 6,113 (11.7)                    | <0.001               | <0.001               | <0.001               |
| Moderately differentiated                     | 295,400 (67.3)            | 6,492 (72.9)           | 37,481 (72.0)                   |                      |                      |                      |
| Poorly differentiated                         | 84,042 (19.1)             | 1,569 (17.6)           | 7,951 (15.3)                    |                      |                      |                      |
| Undifferentiated                              | 5,787 (1.3)               | 83 (1.0)               | 513 (1.0)                       |                      |                      |                      |

|                                 |                |              |               |       |        |        |
|---------------------------------|----------------|--------------|---------------|-------|--------|--------|
| Insurance status<br>N = 139,962 |                |              |               | 0.683 | <0.001 | <0.001 |
| Uninsured                       | 3,814 (3.2)    | 92 (3.3)     | 1,248 (7.0)   |       |        |        |
| Insured                         | 115,472 (96.8) | 2,666 (96.7) | 16,670 (93.0) |       |        |        |

SD: Standard deviation

AJCC: American Joint Committee on Cancer

TNM: Tumor-Node-Metastasis

\*USA dollars

# Percent that completed high school

P<sup>1</sup>: The comparison between Caucasian and Chinese patients

P<sup>2</sup>: The comparison between Caucasian and African-American patients

P<sup>3</sup>: The comparison between Chinese and African-American patients

1970's, the 5-year CSS for CRC patients was only 50.7% and it increased to be 65.9% in the 21 century,  $P < 0.001$ .

### Multivariate analysis

Variables showing a trend for association with survival ( $P < 0.05$ ) were selected in the cox proportional hazards model. Sex, age, race/ethnicity, married status, tumor site, TNM stage, histologic subtypes, grade, insurance status as well as the time of diagnosis were all independent prognostic factors in the multivariable analysis. The HR for race/ethnicity was 1.09, 95%

confidence interval (CI): 1.05-1.13 (Table 3),  $P < 0.001$ . Compared for Caucasian patients, the hazard ratio (HR) for Chinese patients was 0.86 and 1.22 for African American.

### DISCUSSION

Previous studies had showed that despite improvements in treatment, racial disparities persisted in CRC incidence, mortality and survival [6-8]. African Americans were reported to have higher incidence rates and lower survival rates for CRC than Caucasian in

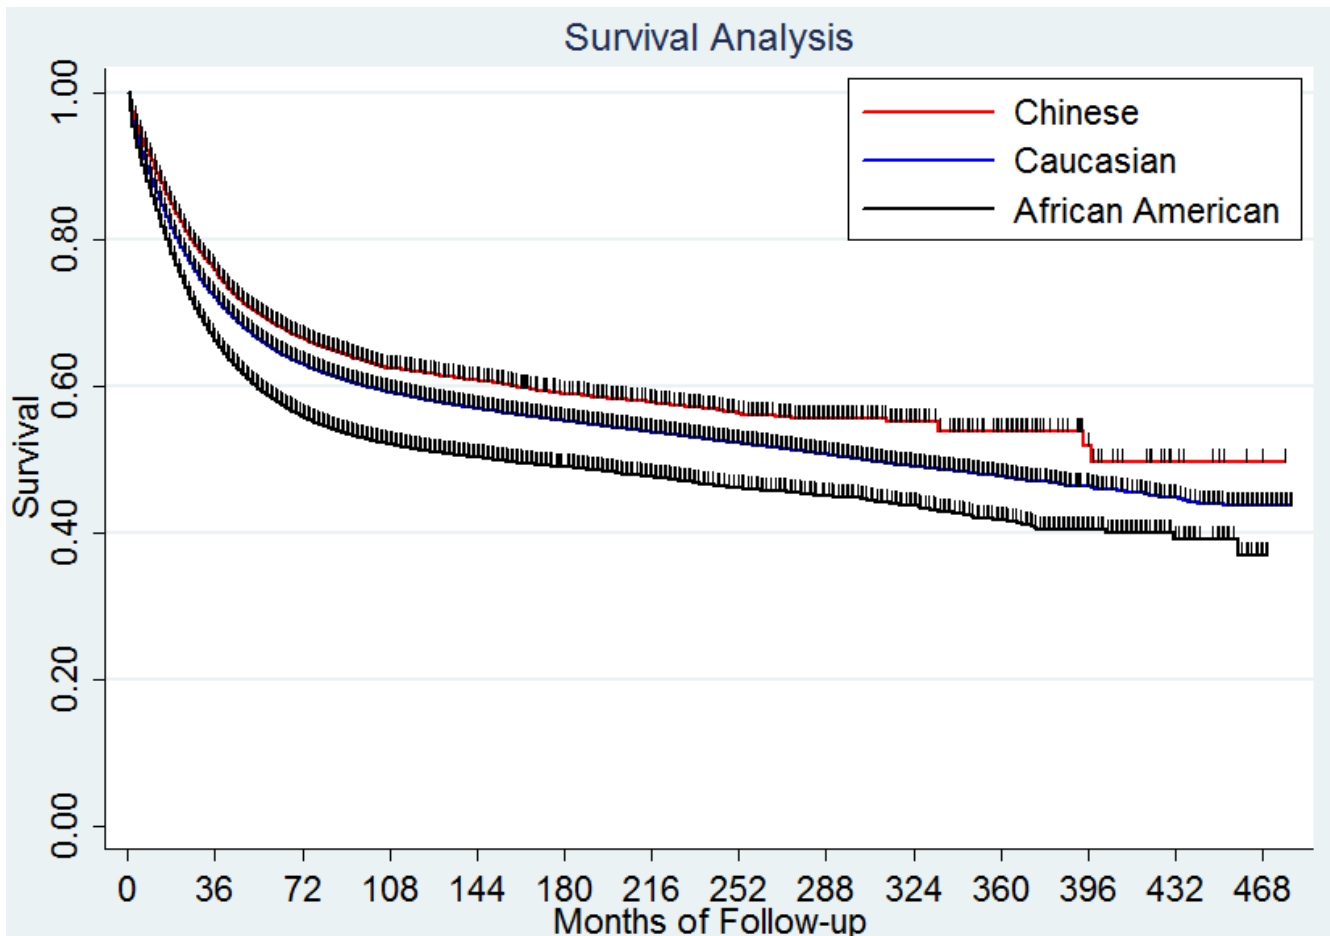

Figure 1: Survival difference among the three race/ethnicities.

**Table 2: Univariate analysis of 5-year cause specific survival**

|                                | 5-year CSS (95% CI) | Univariate analysis |         |
|--------------------------------|---------------------|---------------------|---------|
|                                |                     | Log rank            | P value |
| Sex                            |                     |                     |         |
| Male                           | 62.1% (61.9%-62.3%) | 24.38               | <0.001  |
| Female                         | 62.5% (62.3%-62.7%) |                     |         |
| Age                            |                     |                     |         |
| <70                            | 65.6% (65.4%-65.8%) | 2697.73             | <0.001  |
| >69                            | 58.7% (58.5%-58.9%) |                     |         |
| Race/ethnicity                 |                     |                     |         |
| Caucasian                      | 62.9% (62.8%-63.1%) | 985.98              | <0.001  |
| Chinese                        | 66.7% (65.7%-67.7%) |                     |         |
| African American               | 55.9% (55.4%-56.3%) |                     |         |
| Married status                 |                     |                     |         |
| Single                         | 57.7% (57.3%-58.2%) | 3034.92             | <0.001  |
| Separated or divorced          | 59.6% (59.1%-60.0%) |                     |         |
| Widowed                        | 56.6% (56.3%-56.9%) |                     |         |
| Married                        | 65.4% (65.2%-65.5%) |                     |         |
| Primary tumor                  |                     |                     |         |
| Left colon                     | 64.0% (63.7%-64.2%) | 674.08              | <0.001  |
| Right colon                    | 61.6% (61.4%-61.8%) |                     |         |
| Rectum                         | 60.3% (60.0%-60.6%) |                     |         |
| AJCC 6 <sup>th</sup> TNM stage |                     |                     |         |
| I                              | 90.9% (90.6%-91.2%) | 84623.76            | <0.001  |
| II                             | 81.3% (80.9%-81.7%) |                     |         |
| III                            | 66.8% (66.3%-67.3%) |                     |         |
| IV                             | 12.2% (11.8%-12.6%) |                     |         |
| Histology subtype              |                     |                     |         |
| Signet ring cell               | 30.4% (29%-31.9%)   | 2769.67             | <0.001  |
| Mucinous adenocarcinoma        | 57.1% (56.6%-57.6%) |                     |         |
| Other adenocarcinoma           | 63.1% (63%-63.3%)   |                     |         |
| Grade                          |                     |                     |         |
| Well differentiated            | 73.9% (73.5%-74.3%) | 13698.5             | <0.001  |
| Moderately differentiated      | 65.8% (65.6%-66%)   |                     |         |
| Poorly differentiated          | 48.1% (47.8%-48.5%) |                     |         |
| Undifferentiated               | 45.9% (44.5%-47.4%) |                     |         |
| Insurance status               |                     |                     |         |
| Uninsured                      | 57.8% (55.7%-59.9%) | 105.08              | <0.001  |
| Insured                        | 67.2% (66.8%-67.5%) |                     |         |
| Time of diagnosis              |                     |                     |         |
| 1973-1979                      | 50.7% (50.2%-51.1%) | 4835.37             | <0.001  |
| 1980-1989                      | 57.3% (57.0%-57.7%) |                     |         |
| 1990-1999                      | 62.3% (62.0%-62.6%) |                     |         |
| 2000-2012                      | 65.9% (65.7%-66.1%) |                     |         |

CSS: Cause specific survival

CI: Confidence interval

AJCC: American Joint Committee on Cancer

TNM: Tumor-Node-Metastasis

the United States [2, 3, 9, 10]. According to the Global Cancer Statistics, the incidence of CRC is rising in East Asia including Hong Kong and Shanghai in China [4, 11]. To our best knowledge, this is the first population-

based comparisons of CSS in CRC patients with these three race/ethnicities. In the present study, we used all the CRC adenocarcinoma patients for analysis and found that Chinese patients had a significantly better 5-year CSS

**Table 3: Multivariate analysis of survival**

|                                | Hazard ratio | Standard error | P value | 95% confidence interval |
|--------------------------------|--------------|----------------|---------|-------------------------|
| Sex                            |              |                |         |                         |
| Male                           | Reference    |                |         |                         |
| Female                         | 0.92         | 0.013          | <0.001  | 0.89-0.95               |
| Age                            |              |                |         |                         |
| <70                            | Reference    |                |         |                         |
| >69                            | 1.87         | 0.029          | <0.001  | 1.81-1.93               |
| Race/ethnicity                 |              |                |         |                         |
| White                          | Reference    |                |         |                         |
| Chinese                        | 0.86         | 0.046          | 0.005   | 0.78-0.96               |
| African American               | 1.22         | 0.024          | <0.001  | 1.17-1.27               |
| Married status                 |              |                |         |                         |
| Married                        | Reference    |                |         |                         |
| Separated/Divorced             | 1.21         | 0.027          | <0.001  | 1.16-1.26               |
| Single                         | 1.32         | 0.026          | <0.001  | 1.27-1.37               |
| Widowed                        | 1.41         | 0.028          | <0.001  | 1.36-1.47               |
| Site                           |              |                |         |                         |
| Right colon                    | Reference    |                |         |                         |
| Left colon                     | 0.88         | 0.014          | <0.001  | 0.85-0.90               |
| Rectum                         | 1.08         | 0.021          | <0.001  | 1.04-1.13               |
| AJCC 6 <sup>th</sup> TNM stage |              |                |         |                         |
| I                              | Reference    |                |         |                         |
| II                             | 1.81         | 0.064          | <0.001  | 1.69-1.94               |
| III                            | 3.90         | 0.128          | <0.001  | 3.66-4.16               |
| IV                             | 21.39        | 0.681          | <0.001  | 20.10-22.77             |
| Histology subtype              |              |                |         |                         |
| Other adenocarcinoma           | Reference    |                |         |                         |
| Mucinous adenocarcinoma        | 1.06         | 0.025          | 0.014   | 1.01-1.11               |
| Signet ring cell               | 1.54         | 0.073          | <0.001  | 1.40-1.69               |
| Grade                          |              |                |         |                         |
| Well differentiated            | Reference    |                |         |                         |
| Moderate differentiated        | 1.14         | 0.037          | <0.001  | 1.07-1.22               |
| Poorly differentiated          | 1.73         | 0.059          | <0.001  | 1.62-1.85               |
| Undifferentiated               | 1.82         | 0.090          | <0.001  | 1.65-2.00               |
| Insurance status               |              |                |         |                         |
| Insured                        | Reference    |                |         |                         |
| Uninsured                      | 1.21         | 0.042          | <0.001  | 1.13-1.30               |
| Time of diagnosis              |              |                |         |                         |
| 1973-1979                      | Reference    |                |         |                         |
| 1980-1989                      | 0.85         | 0.007          | <0.001  | 0.83-0.86               |
| 1990-1999                      | 0.73         | 0.006          | <0.001  | 0.71-0.74               |
| 2000-2012                      | 0.64         | 0.005          | <0.001  | 0.63-0.65               |

AJCC: American Joint Committee on Cancer  
 TNM: Tumor-Node-Metastasis

than the other two races while African American patients had the worst prognosis. Compared with Caucasian patients, the risk of cancer related death was 14% lower in Chinese patients and 22% higher in African American patients. What caused the difference? Numerous reports have indicated that socioeconomic status seemed to be

important in the poor prognosis of African American patients [9, 12]. While, other studies suggested that biological factors might be responsible for the poor survival in African American patients [3]. In the present study, we also made a comparison of clinicopathologic features among these three groups. Some of the differences

may explain the survival disparity.

We classified the basic characteristics in Table 1 into two groups: socioeconomic factors (including married status, insurance status, income, residence and time of diagnosis) and biologic factors (including age, sex, site, TNM stage, histologic subgroup and grade). As for the socioeconomic factors, we found that the insurance coverage rate, income and urban residence was lowest in the African American patients, moreover, Chinese patients had the highest percentage of married, while African American patients ranked lowest. The insurance status would affect the treatment and furthermore cause a difference in survival [13, 14]. Previous study showed that marital status was an independent prognostic factor for survival in CRC patients [15, 16]. More in detail, unmarried patients were at greater risk of cancer specific mortality [15]. In the present study, we also found that married patients had a better CSS compared with the other subgroups of married status patients. Insured patients also had a better CSS than uninsured patients. It seemed that socioeconomic status might account for the difference in prognosis among these three race/ethnicities.

More African American patients were diagnosed as stage IV and had high percentage of signet ring cell and mucinous adenocarcinoma. Previous studies showed that CRC patients with signet-ring cells or mucinous adenocarcinoma had poor prognoses and were recommended to be given significant clinical attention [17, 18]. Our study also showed that patients with signet ring cell and mucinous adenocarcinoma had significantly poorer 5-year CSS than those with other adenocarcinoma.

More and more evidence suggested that primary colon and rectal tumors should no longer be considered as a single disease entity [19-21]. Previous reports had described differences in biology and outcome based on whether the primary was right or left sided [22, 23]. Poor prognosis of right-sided primary was consistently observed compared with those with a left-sided primary [21, 24]. Our data also showed that left side colon patients had a significantly better 5-year CSS compared with right side and rectum cancer patients. Moreover Chinese patients had a highest proportion of left colon cancer among these three race/ethnicities.

However, we also found some controversial phenomenon. African-America CRC patients were diagnosed at a younger age while young patients were supposed to have a better survival. Moreover, African American CRC patients had higher proportion of well differentiated and lower proportion of undifferentiated tumors than Chinese patients, but they still had a poorer survival than Chinese patients. The multivariate analysis confirmed that these clinicopathologic factors analyzed above were all independent prognostic factors. Until now, we still have no idea how these factors work together and how much they predict outcome. It is likely that biological differences as well as socioeconomic status both

contributed to the survival disparity among the different race/ethnicities.

There were few studies about the survival of the whole Chinese CRC patients in China. Most of the studies focus on the subgroups of CRC patients. One study showed that the 5 year survival of Chinese CRC patients in China was 68.0% [25]. Though it was hard to make a comparison across the studies, there is no large difference for Chinese CRC patients in China vs. Chinese America. Of note, in this study, we focused on Chinese American CRC patients, while not Asian American CRC patients. Since white, black and Chinese are three independent categories in the item of race/ethnicity of SEER database. If we use Asian data, we have to combine several categories together.

We realized there were some limitations of our analysis. Although this was a population-based registry and we had a large sample size, we were unable to include some other known prognostic factors into analysis such as chemotherapy use, smoking status and aspirin usage, since the database does not have these information. Moreover, not all the patients enrolled for analysis had the full information of all the clinical features. Finally, the genetic difference among these three race/ethnicities are also out of our reach.

In conclusion, we used the SEER database to evaluate the survival disparity of CRC patients with the race/ethnicity of African American, Caucasian and Chinese. We showed that Chinese patients had the best 5-year CSS and African American had the poorest 5-year CSS. The comparison of clinicopathologic features among these three race/ethnicities provided some clues to explain the survival disparity. Both biological differences and socioeconomic status may contribute to the survival disparity.

## **MATERIALS AND METHODS**

### **Database**

The SEER database is the largest publicly available cancer dataset. It is a population-based cancer registry across several disparate geographic regions. The SEER research data include cancer incidence and prevalence as well as demographic information tabulated by age, sex, race/ethnicity, year of diagnosis and geographic region. The exact dataset we used for this analysis was Surveillance, Epidemiology, and End Results (SEER) Program (www.seer.cancer.gov) Research Data (1973-2012), National Cancer Institute, DCCPS, Surveillance Research Program, Surveillance Systems Branch, released April 2015, based on the November 2014 submission, "Incidence-SEER 18 Regs Research Data + Hurricane Katrina Impacted Louisiana Cases, Nov 2014 Sub (1973-

2012 varying)”

## Outcome variables

The anatomic subsites of the left colon, right colon and rectum were categorized according to the International Classification of Diseases for Oncology, third edition (ICD-0-3) topography codes. Right-sided colon cancers were identified with the following SEER cancer site codes: cecum (ICD-0-3 code C18.0), ascending colon (Code C18.2), hepatic flexure (Code C18.3) and transverse colon (Code C18.4). Left-sided colon cancers were identified with codes: splenic flexure (Code C18.5), descending colon (code C18.6), sigmoid colon (code C18.7) and rectosigmoid (code C19.9). Rectal cancer was identified as code C20.9.

In this manuscript, only adenocarcinoma patients were enrolled (SEER histology codes: signet ring cell, 8490; mucinous adenocarcinoma, 8480 and 8481; other adenocarcinoma: 8140 to 8147, 8210 to 8211, 8220 to 8221, and 8260 to 8263).

For the insurance status, individuals in the “Any Medicaid”, “Insured” and “Insured/No specifics” groups were clustered together as “Insured group”. For the married status, we combined the “Separated” and “Divorced” as “separated / divorced” group, and combined the “Single” and “Unmarried or Domestic Partner” and “Single” group.

## Patient population

The study population was based on the SEER cancer registry. Left colon, right colon as well as rectum adenocarcinoma patients with a race/ethnicity of white, black or Chinese from 1973 through 2012 were eligible for the study. Patients were excluded if they had more than one primary cancer but the CRC wasn't the first one, had unknown cause of death or unknown survival months.

Age, sex, American Joint Committee on Cancer (AJCC) Cancer Staging Manual (6<sup>th</sup> edition, 2004), histological subtype, grade, insurance status, married status, time of diagnosis, survival time and CSS were extracted from the SEER database.

## Statistical methods

The patients' demographic and tumor characteristics were summarized with descriptive statistics (Table or Figure). Comparisons of categorical variables among these three race/ethnicity populations were performed using the Chi square test, and continuous variables were compared using Student's t test. The primary endpoint of this study was 5-year CSS, which was calculated from the date of diagnosis to the date of cancer specific death. Deaths

attributed to CRC were treated as events and deaths from other causes were treated as censored observations. Survival function estimation and comparison among African American, Caucasian and Chinese were performed using Kaplan-Meier estimates and the log-rank test. The independence of the prognostic effect of race/ethnicity was evaluated by adjusting for other known factors including age at diagnosis and tumor stage. The multivariate Cox proportional hazard model was used to evaluate the HR and the 95 % CI for all the known prognostic factors. All of statistical analyses were performed using the Intercooled Stata 13.0 (Stata Corporation, College Station, TX). Statistical significance was set at two-sided  $P < 0.05$ .

## ACKNOWLEDGMENTS

We would like to thank the staff members of the National Cancer Institute and their colleagues across the United States and at Information Management Services, Inc., who have been involved with the Surveillance, Epidemiology and End Results (SEER) Program.

## FUNDING

This work was supported by:

1. The third outstanding young talents training plan of Sun Yat-sen University cancer center.
2. Medical Scientific Research of Guangdong province B2014161.
3. Scientific and Technological projects Guangdong Esophageal Cancer Institute Q201408

## CONFLICTS OF INTEREST

All authors declared that there is no conflict of interest.

## REFERENCES

1. Siegel RL, Miller KD, Jemal A. Cancer statistics, 2015. *CA Cancer J Clin.* 2015; 65: 5-29.
2. Alexander DD, Waterbor J, Hughes T, Funkhouser E, Grizzle W, Manne U. African-American and Caucasian disparities in colorectal cancer mortality and survival by data source: an epidemiologic review. *Cancer Biomark.* 2007; 3: 301-313.
3. Wudel LJ, Jr., Chapman WC, Shyr Y, Davidson M, Jeyakumar A, Rogers SO, Jr., Allos T, Stain SC. Disparate outcomes in patients with colorectal cancer: effect of race on long-term survival. *Arch Surg.* 2002; 137: 550-554; discussion 554-556.
4. Chen W, Zheng R, Zeng H, Zhang S, He J. Annual report on status of cancer in China, 2011. *Chin J Cancer Res.* 2015; 27: 2-12.
5. Hashiguchi Y, Hase K, Ueno H, Shinto E, Naito Y,



- Kajiwaru Y, Kuroda T, Yamamoto J, Mochizuki H. Impact of race/ethnicity on prognosis in patients who underwent surgery for colon cancer: analysis for white, African, and East Asian Americans. *Ann Surg Oncol*. 2012; 19: 1517-1528.
6. Aizer AA, Wilhite TJ, Chen MH, Graham PL, Choueiri TK, Hoffman KE, Martin NE, Trinh QD, Hu JC, Nguyen PL. Lack of reduction in racial disparities in cancer-specific mortality over a 20-year period. *Cancer*. 2014; 120: 1532-1539.
  7. Grubbs SS, Polite BN, Carney J, Jr., Bowser W, Rogers J, Katurakes N, Hess P, Paskett ED. Eliminating racial disparities in colorectal cancer in the real world: it took a village. *Del Med J*. 2014; 86: 301-305.
  8. Pinheiro LC, Wheeler SB, Chen RC, Mayer DK, Lyons JC, Reeve BB. The effects of cancer and racial disparities in health-related quality of life among older Americans: a case-control, population-based study. *Cancer*. 2015; 121: 1312-1320.
  9. Ward E, Jemal A, Cokkinides V, Singh GK, Cardinez C, Ghafoor A, Thun M. Cancer disparities by race/ethnicity and socioeconomic status. *CA Cancer J Clin*. 2004; 54: 78-93.
  10. Rex DK, Rawl SM, Rabeneck L, Rex EK, Hamilton F. Colorectal cancer in African Americans. *Rev Gastroenterol Disord*. 2004; 4: 60-65.
  11. Center MM, Jemal A, Ward E. International trends in colorectal cancer incidence rates. *Cancer Epidemiol Biomarkers Prev*. 2009; 18: 1688-1694.
  12. Freeman HP. Commentary on the meaning of race in science and society. *Cancer Epidemiol Biomarkers Prev*. 2003; 12: 232s-236s.
  13. Munene G, Parker RD, Shaheen AA, Myers RP, Quan ML, Ball CG, Dixon E. Disparities in the surgical treatment of colorectal liver metastases. *J Natl Med Assoc*. 2013; 105: 128-137.
  14. Shapiro M, Rashid NU, Whang EE, Boosalis VA, Huang Q, Yoon C, Saund MS, Gold JS. Trends and predictors of resection of the primary tumor for patients with stage IV colorectal cancer. *J Surg Oncol*. 2015; 111: 911-916.
  15. Li Q, Gan L, Liang L, Li X, Cai S. The influence of marital status on stage at diagnosis and survival of patients with colorectal cancer. *Oncotarget*. 2015; 6: 7339-7347.
  16. El-Haddad B, Dong F, Kallail KJ, Hines RB, Ablah E. Association of marital status and colorectal cancer screening participation in the USA. *Colorectal Dis*. 2015; 17: O108-114.
  17. Tan Y, Fu J, Li X, Yang J, Jiang M, Ding K, Xu J, Li J, Yuan Y. A minor (< 50%) signet-ring cell component associated with poor prognosis in colorectal cancer patients: a 26-year retrospective study in China. *PLoS One*. 2015; 10: e0121944.
  18. Sung CO, Seo JW, Kim KM, Do IG, Kim SW, Park CK. Clinical significance of signet-ring cells in colorectal mucinous adenocarcinoma. *Mod Pathol*. 2008; 21: 1533-1541.
  19. Disibio G, French SW. Metastatic patterns of cancers: results from a large autopsy study. *Arch Pathol Lab Med*. 2008; 132: 931-939.
  20. Price TJ, Beeke C, Ullah S, Padbury R, Maddern G, Roder D, Townsend AR, Moore J, Roy A, Tomita Y, Karapetis C. Does the primary site of colorectal cancer impact outcomes for patients with metastatic disease? *Cancer*. 2015; 121: 830-835.
  21. Hansen IO, Jess P. Possible better long-term survival in left *versus* right-sided colon cancer - a systematic review. *Dan Med J*. 2012; 59: A4444.
  22. Bufill JA. Colorectal cancer: evidence for distinct genetic categories based on proximal or distal tumor location. *Ann Intern Med*. 1990; 113: 779-788.
  23. Loupakis F, Yang D, Yau L, Feng S, Cremolini C, Zhang W, Maus MK, Antoniotti C, Langer C, Scherer SJ, Muller T, Hurwitz HI, Saltz L et al. Primary tumor location as a prognostic factor in metastatic colorectal cancer. *J Natl Cancer Inst*. 2015; 107.
  24. Jess P, Hansen IO, Gamburg M, Jess T. A nationwide Danish cohort study challenging the categorisation into right-sided and left-sided colon cancer. *BMJ Open*. 2013; 3.
  25. Yuan Y, Li MD, Hu HG, Dong CX, Chen JQ, Li XF, Li JJ, Shen H. Prognostic and survival analysis of 837 Chinese colorectal cancer patients. *World J Gastroenterol*. 2013; 19: 2650-2659.
